# Supplementary material for: Cntnap2 loss drives striatal neuron hyperexcitability and behavioral inflexibility
Source: eLife journal article supplement (doi:10.7554/elife.100162), 2024-07-29
Supplement: fig2-figsupp2-data1 [file elife-100162-fig2-figsupp2-data1-v1.zip]

250/membrane top

Cntnap2+/+

Cntnap2-/-

CASPR2@150

cut @100

cut @20

PV @12

10

membrane bottom

cut @100

75

50

GAPDH @37

25

cut @20

100-250

10-20

20-100

Old (errored) GAPDH membrane

250/membrane top

Cntnap2+/+

Cntnap2-/-

CASPR2@150

cut @100

cut @20

PV @12

10

membrane bottom

cut @100

75

50

GAPDH @37

25

cut @20

100-250

10-20

20-100

Old (errored) GAPDH membrane

3 min
