# Supplementary material for: Cntnap2 loss drives striatal neuron hyperexcitability and behavioral inflexibility
Source: eLife. 2025 Jul 21;13:RP100162. doi: 10.7554/eLife.100162 (PMC12279377; doi:10.7554/eLife.100162)
Supplement: Source data 1. — Excel spreadsheet containing the numerical data used to create all figures, broken down into tabs for each figure panel. [file elife-100162-data1.xlsx]

## Sheet: 1C
Blue LED Intensity (%)	Cntnap2+/+ dSPNs (number of action potentials, averaged by animal)										Cntnap2-/- dSPNs (number of action potentials, averaged by animal)
1	0	0	0	0	0	0	0	0	0		0	0	0	0	0	0	0	0	0	0
2	0	0	0	0	0	0	0	0	0		0	0	0	0	0	0	0	0	0	0
3	0	0	0	0	0	0.333333	0	0	0		0.5	0	0	0.666667	0	0	0	0	0	0
5	0	0	2.66667	0	1.33333	2.33333	4.33333	0	0		3	0	0	5.66667	0	0.333333	1	1	2	1.5
8	0	0.5	6.66667	0	5.33333	5	9	0	0		7.5	1	0	9	0.5	4.66667	3	5.5	8.5	4.5
10	2	1.5	6.66667	0	5.83333	5.66667	9	0	0		8	7	0	8.66667	0.5	6.66667	5	8.5	8.5	6
12	2	1.5	7.33333	0	6.5	6.66667	9.66667	0	0.5		9	7	0	9.66667	1.5	8	5.5	8.5	9.5	6.5
15	5	2.5	8.33333	1.5	7.16667	6.66667	10	0	2.5		9.5	9	0	10	3.5	9.66667	7	9.5	9.5	7
20	5	3.5	8.33333	4	8.5	7.66667	10	0	3.5		10	10	1	10	4	10	7.5	10	9.5	7
25	6	5	9.33333	5.5	8.83333	9.33333	10	1	4		10	10	1.33333	10	7	10	8	10	10	7.5
50	8	6	9.66667	8	9.66667	9.33333	10	4	6.5		10	10	3	10	9.5	10	9.5	10	10	9
75	8	8	9.66667	8	10	9.66667	10.6667	2	7		10	10	3.33333	10	9.5	10	9.5	10	10	10
100	8	7.5	9.66667	8.5	9.66667	9.66667	11.3333	2	7		10	10	3.33333	10	9	10	10	10	10	10

## Sheet: 1E
Blue LED Intensity (%)	Cntnap2+/+ iSPNs (number of action potentials, averaged by animal)											Cntnap2-/- iSPNs (number of action potentials, averaged by animal)
1	0	0	0	0	0	0	0	0	0	0		0	0	0	0	0	0	0	0	0	0
2	0	0	0	0	0	0	0	0	0	0		0	0	0	0	0	0	0	0	0	0
3	0	0	0	0	0.5	2	0	0.666667	0	0		0	0	0	0	0	0	0.333333	0	3.5	0
5	0	0	0	0	5	6.25	0	4.66667	0	0		0	0	0	8	0	3.5	4.66667	0	7.5	5
8	0	0	0	2.5	5	9.5	0	9.33333	0	0		0	0	1	10	1	5	7.66667	0	10	5
10	0	0	0.333333	7.5	5.5	10	1	10	1.5	1		1	1	5	10	3	5.5	9	1	10	5
12	0	0	1	8.5	5	10	3	10	1	4		1.5	1.5	8	10	4	5	9	3	10	5
15	0	1	2	9	5	10	6	10	2	6		2	1.5	8	10	5	6	9.66667	3.5	10	5
20	0	0	2.33333	9.5	5	10	8	10	2	7.5		3.5	1.5	9	10	6	7.5	9.66667	4.5	10	5
25	1	1	4	10	6.5	10	9	10	3.5	9		5	5.5	10	10	8	9	10.3333	4.5	10	5.5
50	4	4	5.66667	10	9.5	10	10	10.3333	3.5	9.5		6.5	7	10	10	10	8.5	11.6667	7.5	10.5	6
75	4	4	6.33333	10	9	10	10	11	4.5	10.5		7.5	10	10	10	10	8.5	11.6667	7.5	11.5	8
100	5	3	6.33333	10	9.5	10	10	10.6667	4	10		7	8.5	10	10	10	10	12	7.5	10.5	7

## Sheet: 1F
Blue LED Intensity (%)	Cntnap2+/+ dSPNs (EPSC amplitude, averaged by animal)									Cntnap2-/- dSPNs (EPSC amplitude, averaged by animal)
8	285.675	129.145	284.56	62.035	35.4666	198.749	304.677	54.8022		232.93	222.51	117.222	77.1568	53.6856
14	749.885	335.49	715.382	187.423	119.901	534.374	841.766	142.425		492.17	505.497	290.553	319.31	282.348
20	1005.94	466.246	1012.82	325.493	199.339	876.7	1182.91	265.889		695.513	661.764	448.001	527.311	566.389

## Sheet: 1H
Blue LED Intensity (%)	Cntnap2+/+ iSPNs (EPSC amplitude, averaged by animal)							Cntnap2-/- iSPNs (EPSC amplitude, averaged by animal)
8	130.668	46.1554	15.4795	289.982	416.828	48.1331		222.51	22.704	156.337	36.6888	33.371
14	250.48	194.852	38.6876	703.519	917.809	178.061		505.497	82.6991	326.419	197.562	169.241
20	359.475	347.987	73.6353	1013.3	1150.24	343.526		661.764	127.14	473.049	264.938	433.032

## Sheet: 1J
Cntnap2+/+ dSPNs (AMPA:NMDA ratio, averaged by animal)	Cntnap2-/- dSPNs (AMPA:NMDA ratio, averaged by animal)
1.78215	1.31262
1.36186	2.02249
2.72105	2.20206
1.10095	1.3002
0.781823	1.21788

## Sheet: 1L
Cntnap2+/+ iSPNs (AMPA:NMDA ratio, averaged by animal)	Cntnap2-/- iSPNs (AMPA:NMDA ratio, averaged by animal)
2.91755	1.56165
1.66678	1.87168
1.68647	2.73315
1.08541	1.78768
1.21161	1.95783

## Sheet: 2C
Stimulation intensity (x0.01mA)	Cntnap2+/+ dSPNs (IPSC amplitude)																		Cntnap2-/- dSPNs (IPSC amplitude)
0.2	9.68087	6.703	101.626	10.7365	319.562	18.1214	25.0888	5.17047	6.0882	5.83873	4.9834	2.33625	10.2283	7.6929	7.85233	7.46967	7.9161		53.6475	102.63	79.3722	451.733	48.7531	12.9638	5.6343	137.94	4.832	3.82647	7.11783	8.05825	3.57747	3.20425	5.80893	5.83463
0.5	196.127	369.721	154.983	240.626	501.214	709.56	188.751	4.97337	13.9591	4.59963	7.071	5.99545	5.4175	17.7364	5.85767	6.65367	34.2235		565.287	231.588	349	1054.33	489.218	276.762	11.8335	267.823	81.0797	9.37783	4.40277	52.8769	7.20373	4.54815	7.84346	5.5924
0.8	889.323	442.376	273.801	326.501	875.309	881.061	421.539	15.2866	96.4915	4.98777	19.1332	27.7112	138.698	159.346	178.893	57.0693	65.8146		923.851	487.898	404.039	1226.64	695.703	374.974	26.7867	293.411	194.563	254.337	318.06	16.2313	300.34	29.377	14.1088	232.225
1	976.071	604.238	342.499	394.227	993.6	819.838	451.731	204.094	126.201	20.5245	12.8597	32.9933	208.049	354.674	511.805	163.16	159.085		870.262	580.069	489.495	1188.72	891.77	391.101	39.7532	400.369	287.701	494.061	301.778	200.695	384.078	299.938	45.7846	295.145
1.2	1112.36	832.871	445.259	436.268	1333.3	983.91	691.331	225.572	174.035	112.429	25.1914	40.6521	776.653	567.066	530.928	197.659	205.677		949.233	636.48	652.456	1290.57	1171.55	476.854	29.2246	457.407	415.359	473.309	383.813	179.577	434.631	285.364	47.6768	302.035
1.5	1176.1	803.898	551.194	565.642	1483.78	1057	975.66	360.281	255.827	138.647	29.1525	86.9892	1056.67	564.135	717.558	380.179	224.19		744.565	752.66	729.962	1201.62	1271.22	1054.15	61.9063	454.752	436.436	736.97	614.64	202.95	725.374	238.474	81.0409	290.731
1.8	1358.72	737.751	896.448	1583.35	1705.34	1457.75	1512.59	311.085	280.941	149.216	59.8894	56.2323	955.807	808.088	873.372	460.946	221.597		996.211	827.741	835.285	1182.46	1313.31	1325.15	68.6335	519.075	403.652	724.458	559.793	206.151	1061.98	356.465	128.913	432.15
2	1490.78	762.695	1027.42	1527.83	1876.29	1603.39	1343.55	372.184	296.32	141.586	78.1871	103.542	1176.1	794.377	751.763	517.657	223.232		998.941	960.241	812.459	1194.29	1355.49	1568.14	104.367	525.006	541.162	755.664	659.116	164.966	1128.81	366.784	121.842	434.669

## Sheet: 2E
Stimulation intensity (x0.01mA)	Cntnap2+/+ iSPNs (IPSC amplitude)																	Cntnap2-/- iSPNs (IPSC amplitude)
0.2	9.08587	8.0033	333.118	114.987	203.776	96.3788	15.5718	5.12687	6.0891	6.11745	4.012	5.2185	3.91365	5.6816	6.50317	0.32		69.8601	212.679	4.92277	541.79	12.9638	10.1589	301.912	189.084	23.1335	3.5443	6.0954	2.93049	5.74067	3.7181	3.20425	8.21067
0.5	214.579	54.1252	747.347	173.699	408.725	339.436	87.3614	5.08979	8.25536	67.6363	8.236	14.9735	4.93149	4.32141	6.99637	9.30867		1025.71	352.255	233.229	947.838	276.762	199.644	359.912	315.142	71.1766	5.6284	211.079	12.763	7.81643	7.0774	4.54815	5.95965
0.8	276.361	242.974	873.254	235.958	531.544	470.336	123.654	6.52452	4.34692	327.4	174.441	33.157	7.21147	428.813	8.4599	88.0307		1209.81	505.917	872.363	1085.91	374.974	280.181	402.06	592.481	143.18	43.6523	532.312	34.6249	233.753	7.12805	29.377	4.48537
1	447.269	330.843	1124.74	350.579	454.536	477.067	211.006	8.522	8.74833	341.993	214.823	50.631	20.6501	160.799	25.2371	164.19		1503.7	789.938	1003.71	1047	391.101	335.087	396.944	787.326	153.685	67.679	452.375	65.4608	219.131	18.4353	299.938	6.17633
1.2	694.767	358.002	1140.25	438.299	648.919	529.214	257.498	13.9986	20.12	356.71	269.303	127.667	155.493	635.73	128.323	275.093		1560.19	1021.45	1188.86	1174.04	476.854	384.442	420.441	966.59	224.622	81.816	554.419	92.8623	268.11	8.5718	285.364	10.1355
1.5	760.677	465.836	1235.08	461.74	691.681	600.607	413.424	14.6994	189.47	322.384	296.689	160.47	256.991	805.573	105.345	293.675		1752.14	1243.88	1271.98	1263.14	1054.15	456.285	431.821	1049.23	253.425	101.402	703.991	140.53	403.317	75.8837	238.474	64.2015
1.8	856.481	629.634	1317.99	745.365	730.491	785.382	630.093	68.5128	142.316	396.745	395.704	159.416	691.898	899.27	134.421	315.33		2166.73	1302.51	1399.32	1303.78	1325.15	529.558	462.362	1178.89	314.775	92.9429	686.974	160.801	711.545	78.4183	356.465	74.2037
2	865.585	864.785	1202.35	941.441	741.914	844.795	724.798	73.8174	190.397	355.919	357.779	126.764	632.374	824.38	208.286	413.476		2262.17	1357.01	1427.95	1374.89	1568.14	563.88	469.533	1087.26	281.423	110.251	743.086	256.784	642.746	88.1589	366.784	88.7161

## Sheet: 2H
Blue LED Intensity (%)	Cntnap2+/+ dSPNs (PV-specific IPSC amplitude)																																		Cntnap2-/- dSPNs (PV-specific IPSC amplitude)
5	4.19915	6.9725	4.7165	7.0921	6.898	5.38197	6.19087	14.5365	4.6901	9.19463	6.0331	6.4898	4.3565	68.4	5.76387	5.47233	6.69965	7.6099	9.88173	8.626	5.89267	9.7548	9.9912	10.361	7.0308	6.46087	6.84807	11.6869	7.18845	4.322	118.003	7.1892	5.3106		12.1753	11.0536	8.49803	6.01187	6.23443	7.58003	6.94447	5.80517	6.16537	7.4525	4.9665	5.96595	4.79607	5.41317	5.78905
10	9.6197	3.6154	3.643	7.7493	5.874	4.2718	5.97987	3.3585	5.3868	7.95585	4.44417	7.13045	3.54253	86.9256	7.97537	6.7806	5.4685	6.8047	9.59633	9.0163	7.60383	6.3457	8.703	14.2361	6.81017	7.93267	5.50407	17.8322	2.0203	11.9651	80.3219	70.3211	461.946		12.481	9.7094	6.81057	6.77987	6.4519	7.49507	16.7909	7.18435	33.2486	7.0774	4.5263	9.2854	5.70313	5.80737	6.75
15	106.973	6.1038	7.021	7.1791	7.1641	5.76333	8.3225	6.299	308.751	29.5262	54.5486	7.6893	7.61143	164.502	19.1564	100.925	7.47183	2.00623	7.7242	5.3512	97.4702	7.94073	8.48453	4.84993	5.4932	5.75063	6.78617	23.98	177.425	14.0242	102.431	288.327	800.894		14.5612	7.306	20.7292	7.5105	32.2918	6.11243	28.6207	25.0179	31.6041	10.971	4.13275	7.10385	4.68753	5.48053	6.5518
20	170.777	16.7907	54.595	6.26398	15.2872	12.2015	7.82647	19.198	324.792	68.539	79.177	9.39833	68.4754	283.211	124.165	203.602	9.1199	5.8719	7.75953	32.5589	119.612	8.82467	7.9948	6.3444	185.846	5.02243	144.91	61.0394	297.644	14.3355	133.038	373.199	994.029		11.9318	2.74367	390.131	6.78833	122.105	197.192	53.9202	39.4925	432.713	33.2194	7.4865	6.15505	8.19058	7.23403	8.29373
25	410.437	21.071	160.623	7.11258	49.3513	10.7491	2.59075	81.1147	282.217	69.0074	171.329	6.58143	65.4615	327.783	705.541	190.894	6.69177	23.5413	101.782	63.4542	471.913	20.8713	3.20903	14.2449	264.996	146.278	347.161	663.217	351.272	30.723	175.163	438.816	998.77		33.304	57.9363	530.052	5.89547	290.724	229.681	285.171	71.8558	639.975	82.4322	10.9819	6.40425	4.53619	8.41477	7.3619
30	1143.48	98.3698	407.929	8.24247	137.321	48.8404	5.1844	60.0545	280.252	68.2893	145.922	7.53722	151.385	259.004	736.738	241.744	6.3313	62.6471	120.302	51.0105	476.957	13.1468	4.55993	19.5965	293.743	273.409	424.711	864.825	355.313	78.2622	233.43	389.122	951.422		45.3867	39.8721	650.912	5.7738	463.897	290.227	293.255	84.9184	841.553	138.953	5.6687	8.81113	6.53563	6.17067	5.50256
35	1484.46	284.539	460.18	7.63787	182.791	138.649	6.27333	65.3037	277.645	77.5509	159.484	11.021	251.411	303.995	840.041	240.849	7.09073	81.0048	104.697	46.6096	478.667	12.6269	5.8133	12.5083	421.003	292.801	428.189	1022.47	337.973	152.454	298.859	461.898	938.027		40.85	53.6882	662.607	13.3303	521.175	422.197	304.9	90.3804	801.518	152.714	4.17467	7.09886	4.74638	7.7783	6.35945
40	1758.32	670.599	386.909	53.6914	209.116	172.245	8.02157	73.7477	299.521	149.172	140.356	7.75734	320.444	335.866	780.945	257.644	6.1931	125.254	91.1895	83.0158	509.084	21.9827	5.57187	27.6241	418.031	266.673	408.385	1069.29	302.114	171.171	373.848	414.148	941.857		47.8737	114.281	671.062	24.1739	634.641	469.24	318.649	64.3799	806.162	177.028	6.00772	6.08452	4.3033	5.0442	6.2031
[truncated: 17 more columns]

## Sheet: 2J
Blue LED Intensity (%)	Cntnap2+/+ iSPNs (PV-specific IPSC amplitude)																									Cntnap2-/- iSPNs (PV-specific IPSC amplitude)
5	25.9762	23.6303	6.8952	9.84667	2.94117	5.8345	6.3974	5.68245	8.78385	3.36757	6.40653	5.5983	9.36367	5.6826	5.51437	203.926	6.41045	5.4395	4.88535	7.4466	7.5716	5.2055	3.96105	5.34755		6.16343	10.5666	6.01407	13.7254	4.906	5.00713	6.69703	7.11695	6.75587	9.45542	243.301	5.36127	6.87497	11.4693	3.8352	13.7958	6.28073	8.92967	9.02943	5.50733	6.31867	6.14403	7.17627	5.4114
10	22.3291	15.2592	11.7623	9.84357	246.576	6.303	8.82703	263.997	5.518	35.38	9.706	7.10737	12.318	6.0001	4.3672	212.25	6.0298	5.38873	6.3644	-8.47147	5.5856	153.094	82.8969	330.69		12.0306	7.11515	5.9504	7.34655	5.956	6.87386	10.4946	12.3909	6.3468	6.89147	782.838	6.00797	13.7198	7.07003	47.3215	22.5998	4.90733	97.3057	9.88567	5.21822	5.98837	8.39003	5.4474	7.67295
15	66.2754	12.6476	10.0862	95.1844	431.756	8.37493	6.98023	173.458	5.438	15.5659	6.74803	159.484	11.9223	8.99363	74.5651	242.637	92.1132	5.59282	7.3436	359.722	14.9212	398.09	89.6413	599.808		83.3263	16.0696	39.1345	6.3078	5.55333	6.00927	8.429	17.4407	6.98961	368.418	804.533	7.8873	106.636	141.972	453.912	471.665	164.391	388.743	15.3154	169.545	10.3972	4.84863	78.0644	27.654
20	61.8291	34.5869	8.83967	529.333	519.582	5.07923	43.6233	293.301	75.7176	36.731	8.28888	263.574	10.179	33.9014	159.555	911.856	131.762	21.6622	13.8876	486.938	68.6265	966.886	105.816	636.378		334.782	39.6122	75.8242	6.12247	10.2807	6.15945	11.0327	27.4599	6.08124	507.207	856.209	10.2672	395.781	146.019	486.955	546.625	241.002	539.233	40.5468	199.903	17.9431	21.611	160.236	88.4546
25	307.178	85.0047	15.5387	481.526	575.009	3.68333	53.5792	481.203	106.578	70.7202	133.345	364.325	7.00367	25.6862	337.457	907.218	299.257	51.5091	99.1942	568.746	96.837	1234.1	100.567	654.182		619.627	56.74	82.1574	4.39027	16.7638	5.36433	10.3417	44.0031	5.84249	507.013	820.804	9.8	437.846	154.987	622.325	665.911	294.38	1131.75	120.983	230.791	43.4849	53.7723	216.634	108.972
30	638.665	386.794	105.456	486.655	581.836	43.6831	63.1946	486.819	94.6864	66.1868	194.244	394.5	55.5898	54.6153	347.966	918.386	322.177	126.705	149.903	672.325	103.568	1472.19	152.822	716.263		621.476	43.5337	84.4932	4.7755	50.7467	13.8012	12.425	39.5412	8.31903	595.029	950.773	9.3894	483.411	235.069	642.402	841.886	366.969	1077.4	118.507	228.937	74.6006	65.883	244.173	134.336
35	848.701	872.994	331.048	529.003	555.56	36.534	67.1316	590.319	75.6046	84.582	299.226	344.787	106.013	65.4058	392.973	970.924	372.698	179.198	189.496	683.483	103.262	1474.3	109.356	696.441		604.696	47.9057	77.38	6.09257	64.8257	29.992	44.0858	62.6791	10.0719	650.116	872.522	34.7989	662.543	220.148	606.649	978.602	458.017	1409.8	178.888	216.239	64.1125	68.0247	214.481	120.238
40	1144.77	1266.51	405.019	480.943	596.605	30.1043	75.9784	558.918	136.209	70.6682	249.37	451.53	110.205	64.6069	490.722	936.19	457.454	201.985	155.967	812.042	95.187	1551.62	144.889	769.971		650.543	38.2356	74.2661	5.4306	87.4914	52.6309	67.4644	71.6668	10.4591	547.622	948.036	27.3014	634.881	239.673	673.454	1073.91	405.279	1408.79	300.939	208.848	73.0428	164.994	254.826	139.414
[truncated: 3 more columns]

[truncated: 107 more sheets: 3B, 3C, 3D, 3E, 3F, 3H, 3I, 3J, 3K, 3L, 4B, 4C, 4E, 4F, 4H, 4I, 4K, 4L, 5E, 5F …]
